# Supplementary material for: Management of Diabetes and Hyperglycemia in Hospitals
Source: Oxford University Press journal article supplement (doi:10.2337/diacare.27.2.553), 2004-02-01
Supplement: 553-sup-clementappendix1.doc [file 553-sup-clementappendix1.doc]

**Appendix 1**

**Example of Standardized Subcutaneous Insulin Orders**

#

# Blood Glucose (BG) Monitoring:  Before meals and at bedtime.  Hrs after meals.  2-3 am

# Goal Premeal BG = 80-150 mg/dL

|  | **Breakfast** | Lunch | Dinner | Bedtime |
| --- | --- | --- | --- | --- |
| **Prandial Insulin**  **Orders** | Give units of:   Lispro (Humalog ®)   Aspart (Novolog®)   Regular | Give units o-f:   Lispro (Humalog ®)   Aspart (Novolog®)   Regular | Give units of:   Lispro (Humalog ®)   Aspart (Novolog®)   Regular |  |
| **Basal Insulin Orders** | Give units of:   NPH   Lente   Ultralente   Glargine |  | Give units of:   NPH   Lente   Ultralente   Glargine | Give units of:   NPH   Lente   Ultralente   Glargine |

Suggested Lag Times for Prandial Insulin:

Aspart/Lispro: 0-15 minutes before eating

Regular: 30 minutes before eating

**For BG<60 mg/dL**

1. If patient can take PO, give 15 grams of fast acting carbohydrate

(4oz fruit juice/non diet soda, 8oz nonfat milk, or 3-4 glucose tablets)

1. If patient cannot take PO, give 25ml of D50 as IV push
2. Check finger capillary glucose q15 minutes and repeat above if BG<80

**Appendix 1(cont.)**

**Premeal “correction dose” algorithm for Hyperglycemia**: To be administered in addition to scheduled insulin dose to correct premeal hyperglycemia.

- Lispro

 Aspart

 **Low Dose Algorithm** ** Medium Dose Algorithm**

***(For pts requiring  40 units of insulin/day)*** ***(For pts requiring 40-80 units of insulin/day)***

| Premeal BG | Additional Insulin |  | Premeal BG | Additional Insulin |
| --- | --- | --- | --- | --- |
| 150-199 | 1 unit |  | 150-199 | 1 unit |
| 200-249 | 2 units |  | 200-249 | 3 units |
| 250-299 | 3 units |  | 250-299 | 5 units |
| 300-349 | 4 units |  | 300-349 | 7 units |
| >349 | 5 units |  | >349 | 8 units |

- **High Dose Algorithm**  **Individualized Algorithm**

***(For pts requiring >80 units of insulin/day)***

| Premeal BG | Additional Insulin |  | Premeal BG | Additional Insulin |
| --- | --- | --- | --- | --- |
| 150-199 | 2 unit |  | 150-199 |  |
| 200-249 | 4 units |  | 200-249 |  |
| 250-299 | 7 units |  | 250-299 |  |
| 300-349 | 10 units |  | 300-349 |  |
| >349 | 12 units |  | >349 |  |

General Insulin Dosing Recommendations:

1. Patients with Type 1 Diabetes

This patient must have insulin to prevent ketosis. Even if the patient is not eating, he/she will need at least basal insulin (NPH/Lente/Ultralente/Glargine) to prevent ketosis.

1. When admitting a patient with Type 1 diabetes, continue the basal insulin that they were taking at home at the same dose. **If the patient will be NPO, use an insulin drip rather than subcutaneous insulin.** The prandial insulin (Regular/Lispro/Aspart) may require adjustment depending on the patient’s situation. If the patient is eating much less the prandial insulin will need to be reduced. Many hospitalized patients are under significant metabolic stress (infection, glucocorticoids, etc.) and may require larger doses of prandial insulin despite eating less.
2. If a patient is newly diagnosed the usual daily insulin requirement is 0.5-0.7 units/kg/day. Half or 50% should be given as basal insulin and the remainder as prandial insulin.
3. Patients with Type 2 Diabetes
   - - 1. If patient is using insulin at home, continue the outpatient regimen and adjust as needed.
       2. If patient has not been using insulin previously, the usual total daily insulin requirement is 0.4-1.0 units/kg/day.
       3. Individual insulin doses vary widely and adjustments should be made based on the bedside and laboratory glucose levels.

**Note: Individual insulin doses vary widely and adjustments should be based on the bedside and laboratory glucose levels.**

**Reprinted with permission, Copyright 2003, The Endocrine Society (Trence DL, Kelly JL, Hirsch IB. The rationale and management of hyperglycemia for in-patients with cardiovascular disease: time for change. J Clin Endocrinol Metab 88:2430-37, 2003)**
